# Supplementary material
Source: Research Square preprint supplement (doi:10.21203/rs.3.rs-10023966/v1)
Supplement: Supplementary file 1 [file 191ba1f6ed2288b43d649ea6.docx]

**Table 1**: Summary of debris collected across the three study regions, the North Pacific Garbage Patch (NPGP), the Papahānaumokuākea National Marine Sanctuary (PNMS), and the Main Hawaiian Islands (MHI), showing results for each island or gyre sampled. The NPGP region includes offshore cleanup operations within the gyre. PNMS values correspond to debris collected on Kuaihelani/Pihemanu (Midway Atoll), Kamole/Kauō (Laysan), and Kapou/Papaʻāpoho (Lisianski) Islands, while MHI data represent shorelines at Kalaupapa (Molokaʻi) and Kahuku (Oʻahu). For each location, the table reports the total amount of debris collected (kg), the number of cleanup events (n), and the mean percentage (± standard deviation) of debris attributed to fishing gear, including fishing-gear fibers (nets, lines, and ropes) and fishing-gear hard plastics (floats, buoys, crates, eel traps, oyster spacers, and other hard plastic fishing gear components), alongside the percentage of remaining hard plastics. The bottom row provides combined values for all NPGP and Hawaiian Island cleanups.
